# Supplementary material
Source: PubMed Central journal article supplement (PMC6059175)
Supplement: awx111_supp.pdf [file awx111_supp.pdf]

## Supplemental material

### **Regulatory T cells ameliorate tissue plasminogen activator-induced brain hemorrhage after stroke**

Leilei Mao<sup>1,2,7,#</sup>, MD, PhD; Peiying Li<sup>1,3,#</sup>, MD, PhD; Wen Zhu<sup>1</sup>, MD; Wei Cai<sup>1</sup>, MD; Zongjian Liu<sup>4</sup>, PhD; Yanling Wang<sup>4</sup>, MD, MS; Wenli Luo<sup>5</sup>, Ph.D; Ruth A. Stetler<sup>1,2</sup>, Ph.D; Rehana K. Leak<sup>6</sup>, Ph.D; Weifeng Yu<sup>3</sup>, MD, PhD; Yanqin Gao<sup>2</sup>, PhD; Jun Chen<sup>1,2</sup>, MD; Gang Chen<sup>8,\*</sup>, MD; Xiaoming Hu<sup>1,2,\*</sup>, MD, PhD

<sup>1</sup>Pittsburgh Institute of Brain Disorders and Recovery and Department of Neurology, University of Pittsburgh School of Medicine, Pittsburgh, Pennsylvania 15213, USA

<sup>2</sup>State Key Laboratory of Medical Neurobiology and Institute of Brain Sciences, Fudan University, Shanghai 200032, China

<sup>3</sup>Department of Anesthesiology, Renji Hospital, Shanghai Jiaotong University School of Medicine, Shanghai 200127, China

<sup>4</sup>China-America Institute of Neuroscience, Beijing Luhe Hospital, Capital Medical University, Beijing 100010, China

<sup>5</sup>AstraZeneca Pharmaceutical Company, Waltham, Massachusetts 02452, USA

<sup>6</sup>Division of Pharmaceutical Sciences, Duquesne University, Pittsburgh, PA 15282, USA

<sup>7</sup>Life Science Research Centre of Taishan Medical University, Taishan 271016, Shandong, China

<sup>8</sup>Department of Neurosurgery, the First Affiliated Hospital of Soochow University, Suzhou, Jiangsu, 215006, China

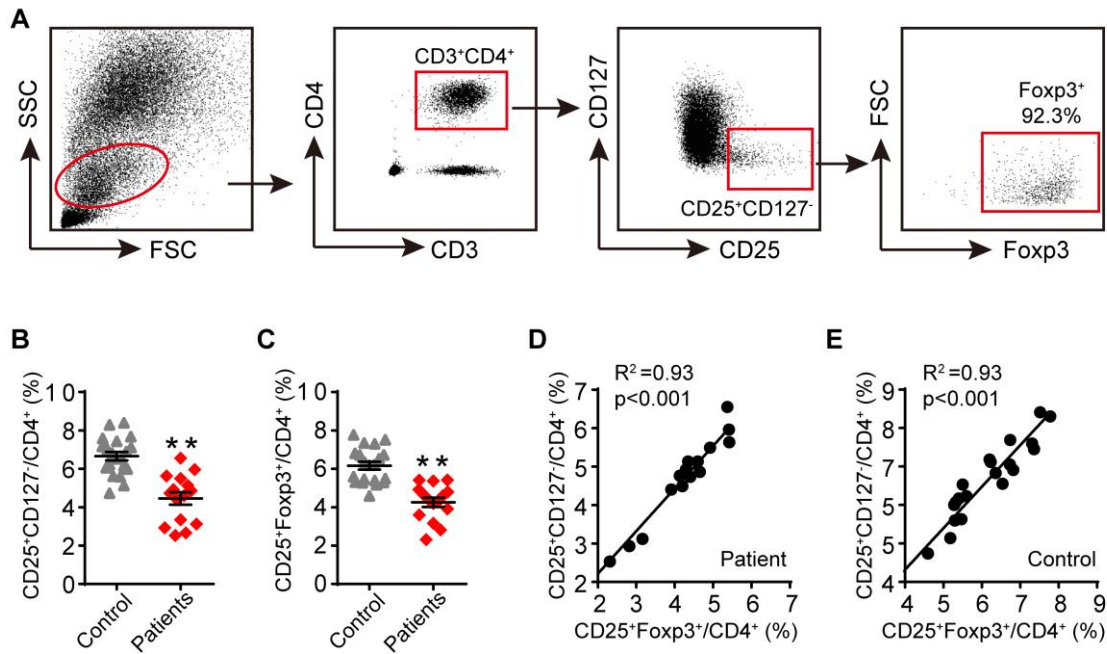

**Supplemental Fig 1.** In a group of blood samples from 15 stroke patients and 20 age and gender-matched healthy volunteers, we used  $CD4^+CD25^+CD127^-$  and  $CD4^+CD25^+Foxp3^+$  as selective markers for Tregs. (A) Representative flow cytometry plot showing that more than 92% of  $CD3^+CD4^+CD25^+CD127^-$  cells were  $Foxp3^+$ . (B-C) Both sets of markers confirmed a significant decrease in Tregs after the onset of ischemic stroke, compared to healthy control subjects. Each dot represents an individual value.  $**p < 0.01$ . (D-E) There was a highly significant correlation between the percentages of  $CD25^+CD127^-$  and  $CD25^+Foxp3^+$  cells within  $CD3^+CD4^+$  populations in both patients ( $r^2 = 0.93$ ;  $p \leq 0.001$ ) and controls ( $r^2 = 0.93$ ;  $p \leq 0.001$ ).

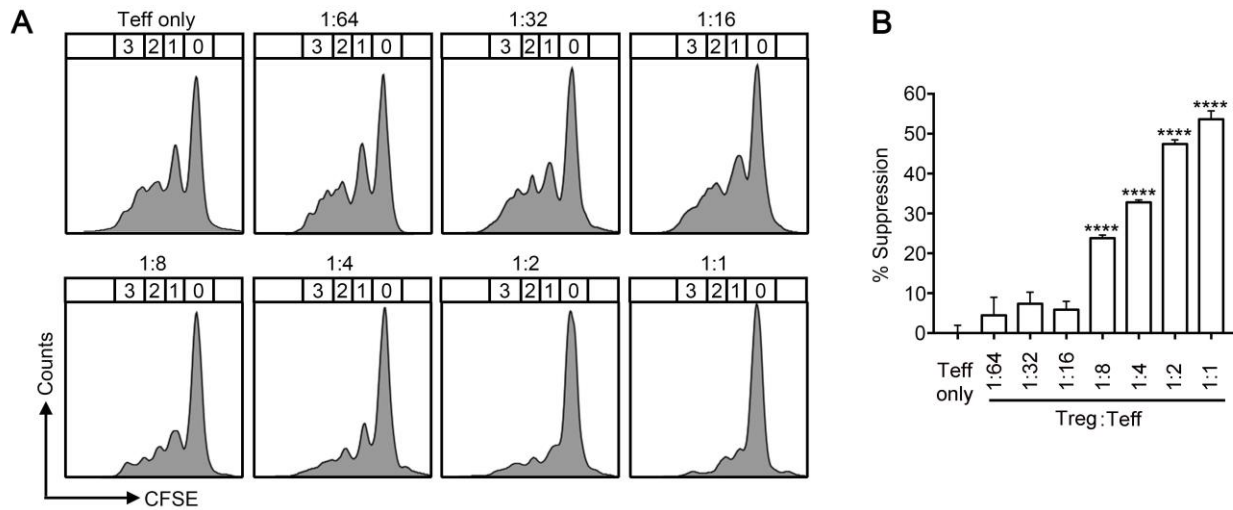

**Supplemental Fig 2. Suppressive function of isolated Tregs *in vitro*.** T effector cells (Teffs) were labeled with CFSE (1  $\mu$ M, 37°C, 10 min) and then plated at  $2 \times 10^5$  per well in a U bottom 96-well plate in the presence of CD3/CD28 activation beads (Miltenyi) to stimulate their proliferation. Tregs were added at a ratio of 1:1, 1:2, 1:4, 1:8, 1:16, 1:32, or 1:64 to the number of Teffs. Cells were incubated for three days. Suppression of Teff proliferation was determined by CFSE dilution on a flow cytometer. **(A)** Representative plots of suppression assay using CFSE-labeled CD4<sup>+</sup>CD25<sup>-</sup> Teffs incubated with CD4<sup>+</sup>CD25<sup>+</sup> Tregs at various ratios. **(B)** The bar graph indicates CFSE dilution in CD4<sup>+</sup>CD25<sup>-</sup> gated Teffs. The percentage of suppression was calculated with the following formula:  $100 - (\% \text{ divided with Tregs present} / \% \text{ divided without Tregs present}) \times 100$ . Data are means  $\pm$  SE of three independent experiments at each ratio of Tregs to Teffs. \*\*\*\*p<0.001 vs Teffs alone.

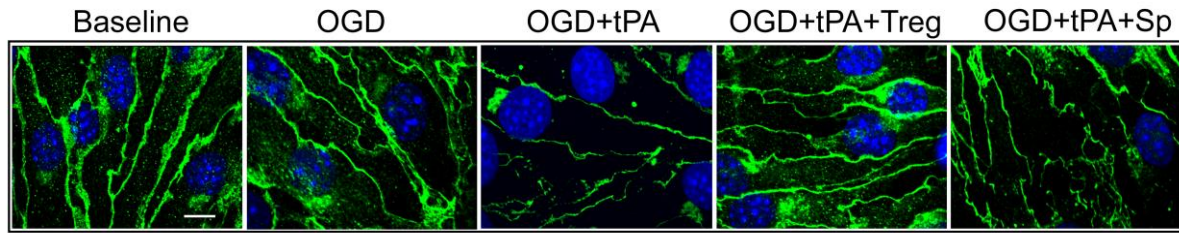

**Supplemental Fig 3. Tregs inhibits OGD+tPA-induced degradation of AJ protein VE-cadherin in mouse endothelial cell cultures.** Mouse primary endothelial cells were exposed to 4 h OGD, with or without tPA (500 ng/ml), and then co-cultured with Tregs or non-selected splenocytes at a 2:1 ratio. Immunostaining for VE-Cadherin was performed at 4h after OGD. Green: VE-cadherin; Blue: DAPI. Tregs protected endothelial cells against OGD+tPA-induced morphological disruption of VE-cadherin. Images are representative of slices from four experiments. Scale bar: 5  $\mu$ M.

**A** CCL2ShRNA Lenti

Two-way RM ANOVA Matching by cols

| Source of Variation | P   | Significant? |
|---------------------|-----|--------------|
| Interaction         | *** | Yes          |
| Time                | *** | Yes          |
| Group               | *** | Yes          |

**Bonferroni posttests**

| Baseline vs OGD |     |             | Baseline vs OGD+tPA |      |             | Baseline vs OGD+tPA+Treg |      |             | Baseline vs OGD+tPA+Sp |     |             |
|-----------------|-----|-------------|---------------------|------|-------------|--------------------------|------|-------------|------------------------|-----|-------------|
| Time            | t   | P value     | Time                | t    | P value     | Time                     | t    | P value     | Time                   | t   | P value     |
| 1h              | 1.5 | P > 0.05    | 1h                  | 0.63 | P > 0.05    | 1h                       | 0.47 | P > 0.05    | 1h                     | 1.3 | P > 0.05    |
| 2h              | 2.9 | P < 0.05    | 2h                  | 2.8  | P < 0.05    | 2h                       | 1.9  | P > 0.05    | 2h                     | 2.6 | P > 0.05    |
| 3h              | 6.1 | P < 0.001 * | 3h                  | 7.5  | P < 0.001 * | 3h                       | 3.6  | P < 0.01    | 3h                     | 5.9 | P < 0.001 * |
| 4h              | 8.4 | P < 0.001 * | 4h                  | 7.9  | P < 0.001 * | 4h                       | 5.6  | P < 0.001 * | 4h                     | 7.5 | P < 0.001 * |
| 6h              | 13  | P < 0.001 * | 6h                  | 16   | P < 0.001 * | 6h                       | 14   | P < 0.001 * | 6h                     | 15  | P < 0.001 * |

| OGD vs OGD+tPA |      |          | OGD vs OGD+tPA+Treg |      |          | OGD vs OGD+tPA+Sp |      |             |
|----------------|------|----------|---------------------|------|----------|-------------------|------|-------------|
| Time           | t    | P value  | Time                | t    | P value  | Time              | t    | P value     |
| 1h             | 0.87 | P > 0.05 | 1h                  | 1    | P > 0.05 | 1h                | 0.24 | P > 0.05 ns |
| 2h             | 0.12 | P > 0.05 | 2h                  | 0.97 | P > 0.05 | 2h                | 0.23 | P > 0.05 ns |
| 3h             | 1.4  | P > 0.05 | 3h                  | 2.5  | P > 0.05 | 3h                | 0.2  | P > 0.05 ns |
| 4h             | 0.49 | P > 0.05 | 4h                  | 2.8  | P < 0.05 | 4h                | 0.82 | P > 0.05 ns |
| 6h             | 2.4  | P > 0.05 | 6h                  | 0.17 | P > 0.05 | 6h                | 2.1  | P > 0.05 ns |

| OGD+tPA vs OGD+tPA+Treg |      |          | OGD+tPA vs OGD+tPA+Sp |      |          |
|-------------------------|------|----------|-----------------------|------|----------|
| Time                    | t    | P value  | Time                  | t    | P value  |
| 1h                      | 0.15 | P > 0.05 | 1h                    | 0.63 | P > 0.05 |
| 2h                      | 0.85 | P > 0.05 | 2h                    | 0.11 | P > 0.05 |
| 3h                      | 3.9  | P < 0.01 | 3h                    | 1.6  | P > 0.05 |
| 4h                      | 2.3  | P > 0.05 | 4h                    | 0.33 | P > 0.05 |
| 6h                      | 2.2  | P > 0.05 | 6h                    | 0.32 | P > 0.05 |

| OGD+tPA+Treg vs OGD+tPA+Sp |      |          |
|----------------------------|------|----------|
| Time                       | t    | P value  |
| 1h                         | 0.79 | P > 0.05 |
| 2h                         | 0.74 | P > 0.05 |
| 3h                         | 2.3  | P > 0.05 |
| 4h                         | 2    | P > 0.05 |
| 6h                         | 1.9  | P > 0.05 |

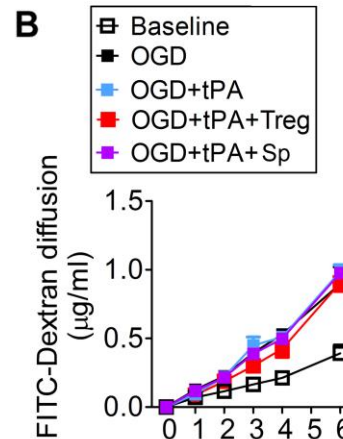

**Supplemental Fig 4. CCL2 is critical for Treg-afforded BBB protection against OGD and tPA.**

Mouse primary endothelial cells (ECs) were transfected with lenti-CCL2 shRNA for 3d, and then exposed to 4 hrs OGD, with or without tPA (500 ng/ml). The pretreated ECs were then co-cultured with Tregs or non-selected splenocytes at a 2:1 ratio. The diffusion of FITC-dextran from the luminal to abluminal chamber was measured over time. (A) Differences between groups at various timepoints were analyzed using a two-way repeated measures ANOVA followed by Bonferroni *post hoc* test. (n=3/group). Data are mean ± SE. Lentiviral-mediated knockdown of CCL2 in ECs provided BBB protection against OGD+tPA treatment. Tregs were unable to provide greater protection of the BBB than CCL2 knockdown. (B) Quantification of FITC-dextran leakage into the luminal chamber over time.

**A Scramble Lenti**  
**Two-way RM ANOVA**      **Matching by cols**  
Source of Variation      P      Significant?  
Interaction      \*\*\*      Yes  
Time      \*\*\*      Yes  
Group      \*\*\*      Yes

**Bonferroni posttests**

| Baseline vs OGD |      |             | Baseline vs OGD+tPA |      |             | Baseline vs OGD+tPA+Treg |      |             | Baseline vs OGD+tPA+Sp |      |             |
|-----------------|------|-------------|---------------------|------|-------------|--------------------------|------|-------------|------------------------|------|-------------|
| Time            | t    | P value     | Time                | t    | P value     | Time                     | t    | P value     | Time                   | t    | P value     |
| 1h              | 0.77 | P > 0.05    | 1h                  | 2.11 | P > 0.05    | 1h                       | 0.56 | P > 0.05    | 1h                     | 2.08 | P > 0.05    |
| 2h              | 2.41 | P > 0.05    | 2h                  | 2.79 | P < 0.05    | 2h                       | 2.07 | P > 0.05    | 2h                     | 3.11 | P < 0.05    |
| 3h              | 4.07 | P < 0.01    | 3h                  | 7.98 | P < 0.001 * | 3h                       | 3.22 | P < 0.05    | 3h                     | 5.61 | P < 0.001 * |
| 4h              | 9.08 | P < 0.001 * | 4h                  | 19.5 | P < 0.001 * | 4h                       | 11   | P < 0.001 * | 4h                     | 19.3 | P < 0.001 * |
| 6h              | 17.1 | P < 0.001 * | 6h                  | 29.5 | P < 0.001 * | 6h                       | 16.6 | P < 0.001 * | 6h                     | 25.2 | P < 0.001 * |

| OGD vs OGD+tPA |      |             | OGD vs OGD+tPA+Treg |      |          | OGD vs OGD+tPA+Sp |      |             |
|----------------|------|-------------|---------------------|------|----------|-------------------|------|-------------|
| Time           | t    | P value     | Time                | t    | P value  | Time              | t    | P value     |
| 1h             | 1.34 | P > 0.05    | 1h                  | 0.21 | P > 0.05 | 1h                | 1.31 | P > 0.05    |
| 2h             | 0.38 | P > 0.05    | 2h                  | 0.34 | P > 0.05 | 2h                | 0.71 | P > 0.05    |
| 3h             | 3.91 | P < 0.01    | 3h                  | 0.85 | P > 0.05 | 3h                | 1.54 | P > 0.05    |
| 4h             | 10.4 | P < 0.001 * | 4h                  | 1.93 | P > 0.05 | 4h                | 10.2 | P < 0.001 * |
| 6h             | 12.4 | P < 0.001 * | 6h                  | 0.54 | P > 0.05 | 6h                | 8.13 | P < 0.001 * |

| OGD+tPA vs OGD+tPA+Treg |      |             | OGD+tPA vs OGD+tPA+Sp |      |             |
|-------------------------|------|-------------|-----------------------|------|-------------|
| Time                    | t    | P value     | Time                  | t    | P value     |
| 1h                      | 1.55 | P > 0.05    | 1h                    | 0.03 | P > 0.05    |
| 2h                      | 0.72 | P > 0.05    | 2h                    | 0.32 | P > 0.05    |
| 3h                      | 4.76 | P < 0.001 * | 3h                    | 2.37 | P > 0.05    |
| 4h                      | 8.51 | P < 0.001 * | 4h                    | 0.23 | P > 0.05    |
| 6h                      | 12.9 | P < 0.001 * | 6h                    | 4.24 | P < 0.001 * |

| OGD+tPA+Treg vs OGD+tPA+Sp |      |             |
|----------------------------|------|-------------|
| Time                       | t    | P value     |
| 1h                         | 1.52 | P > 0.05    |
| 2h                         | 1.05 | P > 0.05    |
| 3h                         | 2.39 | P > 0.05    |
| 4h                         | 8.27 | P < 0.001 * |
| 6h                         | 8.67 | P < 0.001 * |

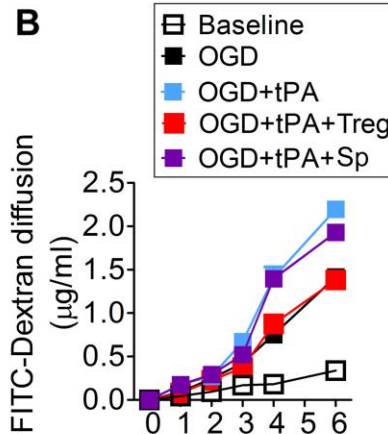

**Supplemental Fig 5. Transfection of mouse endothelial cells (ECs) with lentivirus carrying scrambled shRNA sequences did not significantly influence the protective effects of Tregs on BBB integrity.** Mouse primary endothelial cells were transfected with lenti-scramble for 3d, and then exposed to 4 h OGD, with or without tPA (500 ng/ml). The pretreated ECs were then co-cultured with Tregs or non-selected splenocytes at a 2:1 ratio. The diffusion of FITC-dextran from the luminal to abluminal chamber was measured over time. **(A)** Differences across groups at specific timepoints were analyzed using a two-way repeated measures ANOVA followed by the Bonferroni *post hoc* test. **(B)** The quantification of FITC-dextran leakage into the luminal chamber over time. (n=3/group). Data are mean ± SE.

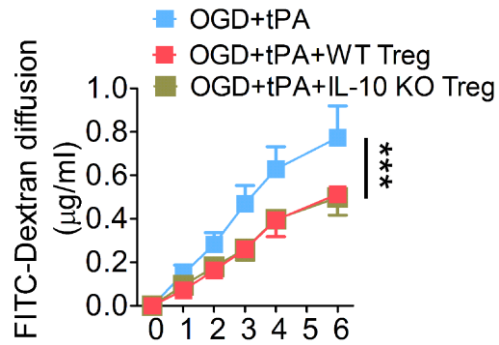

**Supplemental Fig 6. IL-10 is not critical for Treg-afforded BBB protection.** Primary mouse endothelial cells in cell culture inserts were exposed to 4h of oxygen-glucose deprivation (OGD) followed by tPA (500 ng/ml). WT or IL-10 KO Tregs were then added (endothelial cell:Treg= 2:1). The diffusion of FITC-dextran from the luminal to abluminal chamber was measured over time. (n=5/group). Data are mean  $\pm$  SE. \*\*\* $p \leq 0.001$  OGD+tPA vs OGD+tPA+WT Treg; OGD+tPA vs OGD+tPA+IL-10 KO Treg.

**Supplemental Table 1. Clinical characteristics of stroke patients**

| <b>Treatment</b>              | <b>Non-tPA treated</b><br>(n=42) | <b>tPA treated</b><br>(n=23) | <b><i>p</i></b> |
|-------------------------------|----------------------------------|------------------------------|-----------------|
| <b>Age (years)</b>            | 62.40±12.04                      | 62.13±13.02                  | 0.93            |
| <b>Gender (M:F)</b>           | 29:13                            | 15:8                         | 0.787           |
| <b>Diabetes, n, (%)</b>       | N=10, (23.81%)                   | N=6, (26.09%)                | 0.57            |
| <b>Hypertension, n, (%)</b>   | N=34, (80.95%)                   | N=18, (78.26%)               | 0.54            |
| <b>Hyperlipidemia, n, (%)</b> | N=18, (42.86%)                   | N=12, (52.17%)               | 0.31            |
